# Supplementary material for: Surfacing amorphous Ni–B nanoflakes on NiCo2O4 nanospheres as multifunctional bridges for promoting lithium storage behaviors
Source: Royal Society of Chemistry journal article supplement (doi:10.1039/c9nr07733b), 2019-01-01
Supplement: c9nr07733b1.pdf [file c9nr07733b1.pdf]

*Electronic Supplementary Information*

**Surfacing Amorphous Ni-B Nanoflakes on NiCo<sub>2</sub>O<sub>4</sub> Nanospheres as Multifunctional Bridges for Promoting Lithium Storage Behaviors**

*Min Li<sup>a</sup>, Qihao Zhou<sup>b</sup>, Changwei Ren<sup>a</sup>, Nan Shen<sup>a</sup>, Qiang Chen<sup>a</sup>, Jian Zhao<sup>a</sup>, Cong Guo<sup>a</sup>, Lei Zhang<sup>a</sup>, Jingfa Li<sup>a,\*</sup>*

<sup>a</sup> Jiangsu Key Laboratory for Optoelectronic Detection of Atmosphere and Ocean, School of Chemistry and Material Science, Nanjing University of Information Science and Technology, Nanjing, Jiangsu, 210044, China

<sup>b</sup> School of Atmospheric Physics, Nanjing University of Information Science and Technology, Nanjing, Jiangsu, 210044, China

\* Corresponding author: *E-mail:* [aplijf@nuist.edu.cn](mailto:aplijf@nuist.edu.cn) (J. F. Li)

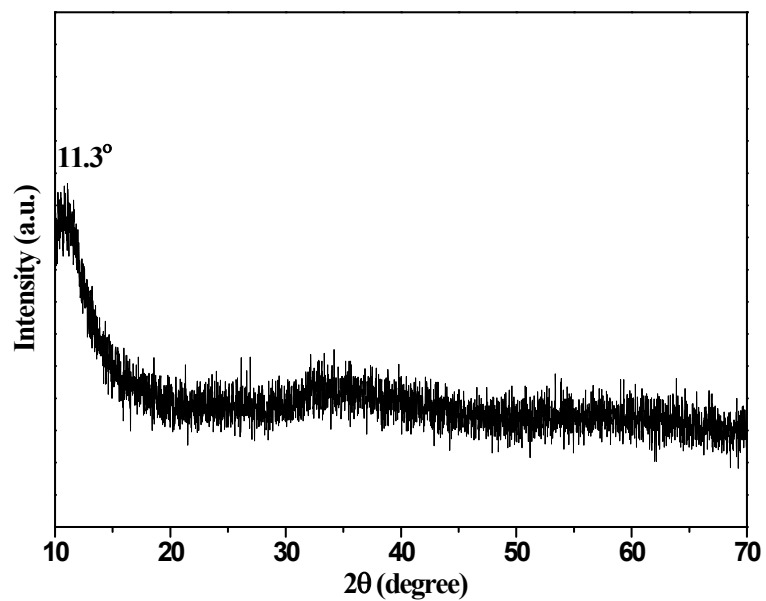

**Figure S1.** XRD pattern of the NiCo<sub>2</sub>-glycerate precursor.

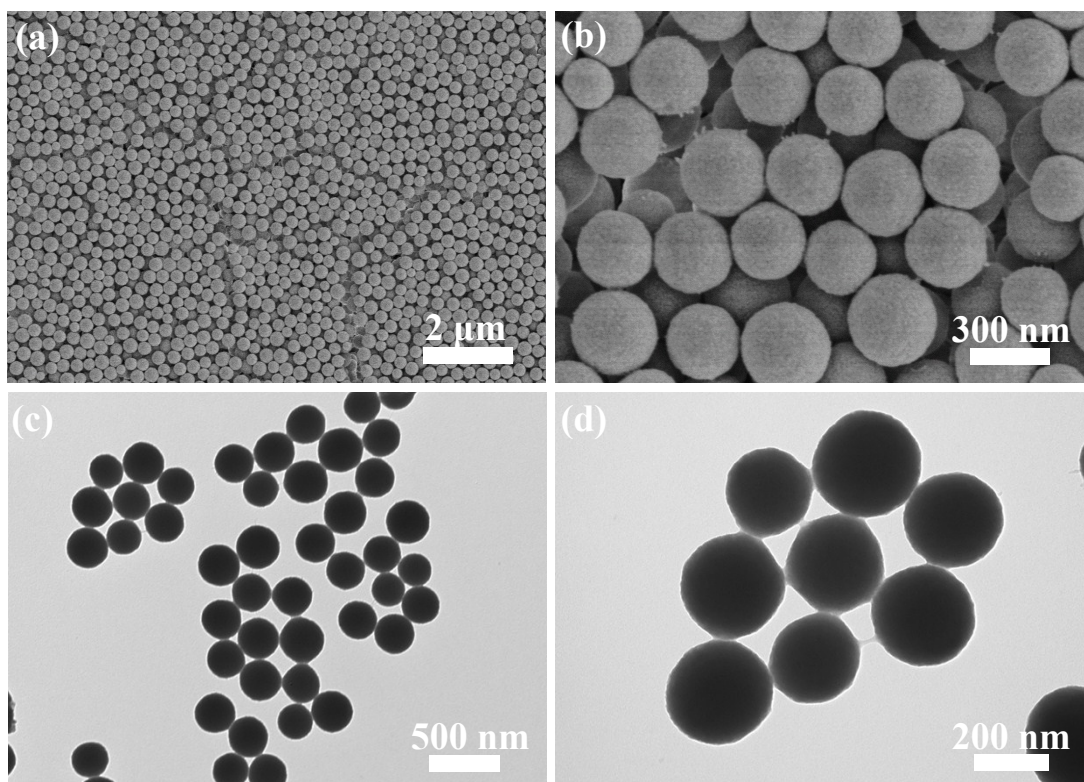

**Figure S2.** Morphologies of NiCo<sub>2</sub>-glycerate precursors: Low and high-magnification (a, b) FESEM and (c, d) TEM.

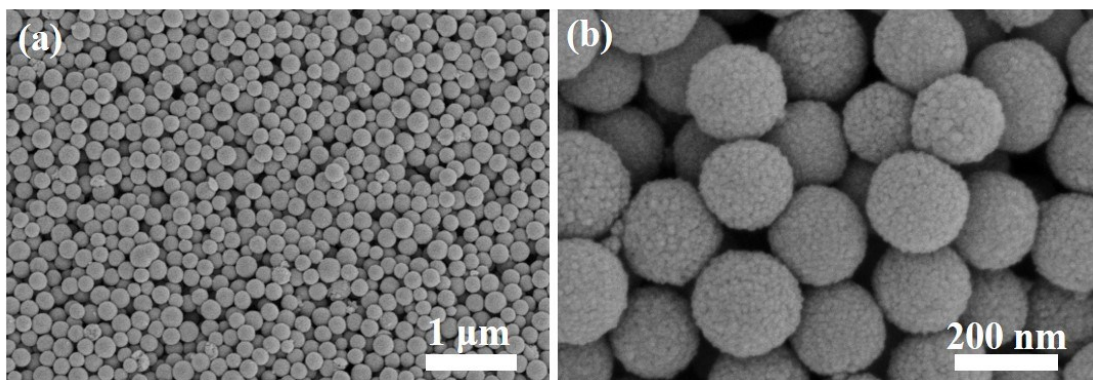

**Figure S3.** More morphology details of NiCo<sub>2</sub>O<sub>4</sub> porous nanospheres.

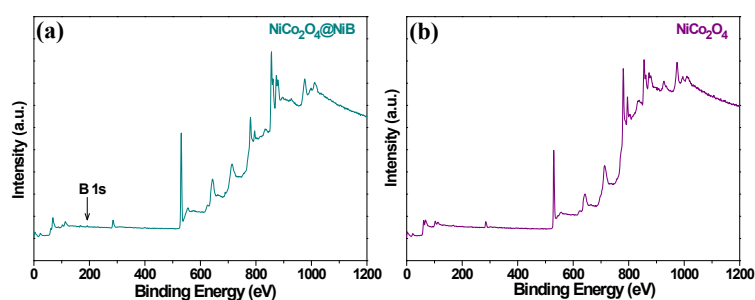

**Figure S4.** Comparison of XPS survey spectra of (a) NiCo<sub>2</sub>O<sub>4</sub>/NiB and (b) NiCo<sub>2</sub>O<sub>4</sub>.

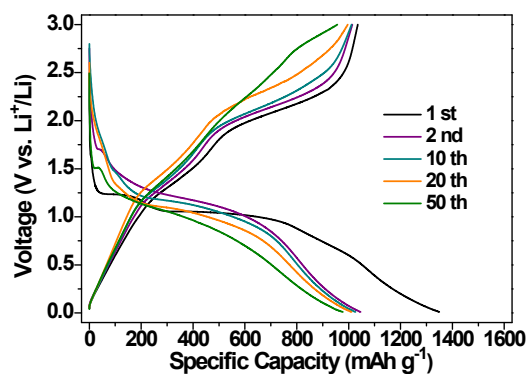

**Figure S5.** Galvanostatic charge–discharge profiles of NiCo<sub>2</sub>O<sub>4</sub> electrode at 0.2 A g<sup>-1</sup> for selected cycles.

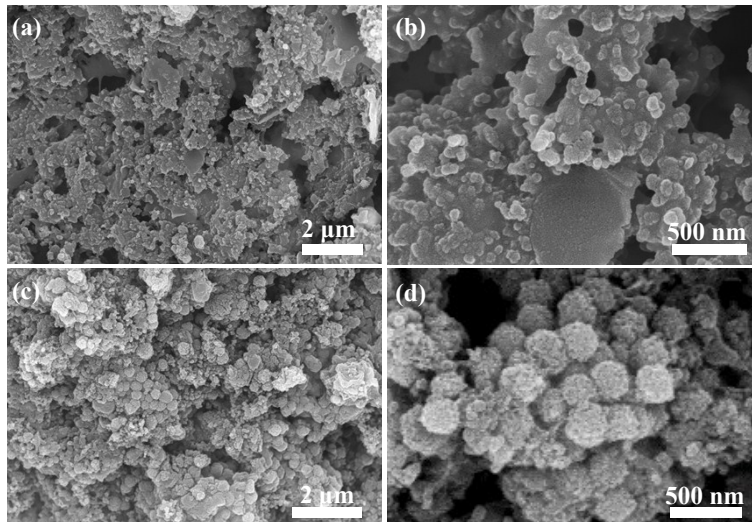

**Figure S6.** Low and high magnification SEM of the sample collected from the  $\text{NiCo}_2\text{O}_4$  (a, b) and  $\text{NiCo}_2\text{O}_4@\text{NiB}$  electrode (c, d) after 500 charge/discharge cycles at  $500\text{mA g}^{-1}$  in LIB testing.

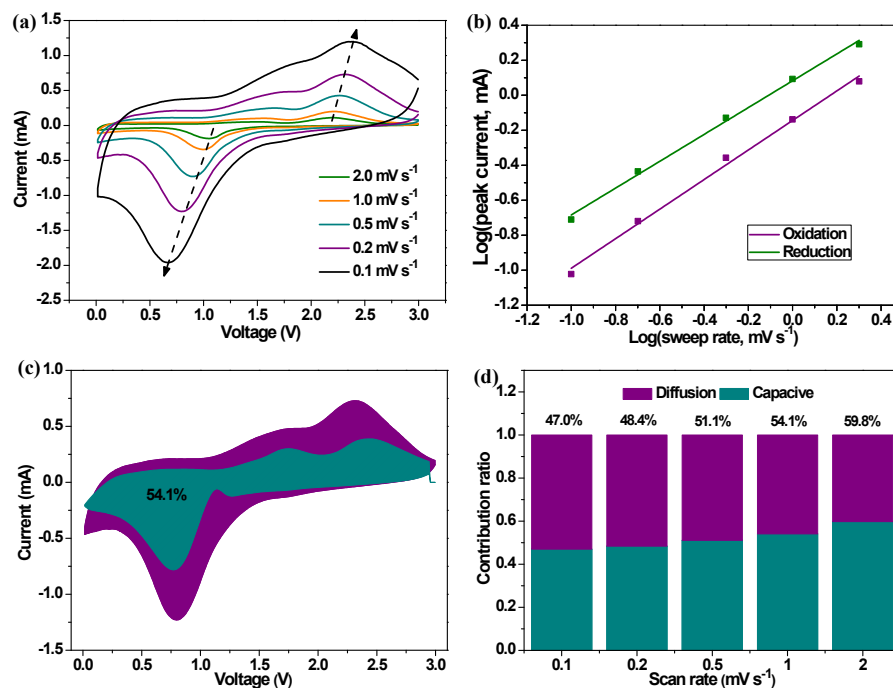

**Figure S7.** a) CV curves at different scan rates, (b) b-value analysis calculation, (c) separation of the capacitive and diffusion-controlled current contribution at  $0.5\text{ mV s}^{-1}$  and (d) contribution ratio of the capacitive and diffusion-controlled charges at different scan rates of the  $\text{NiCo}_2\text{O}_4$  electrode.
